# Supplementary material
Source: PubMed Central journal article supplement (PMC549472)

**A**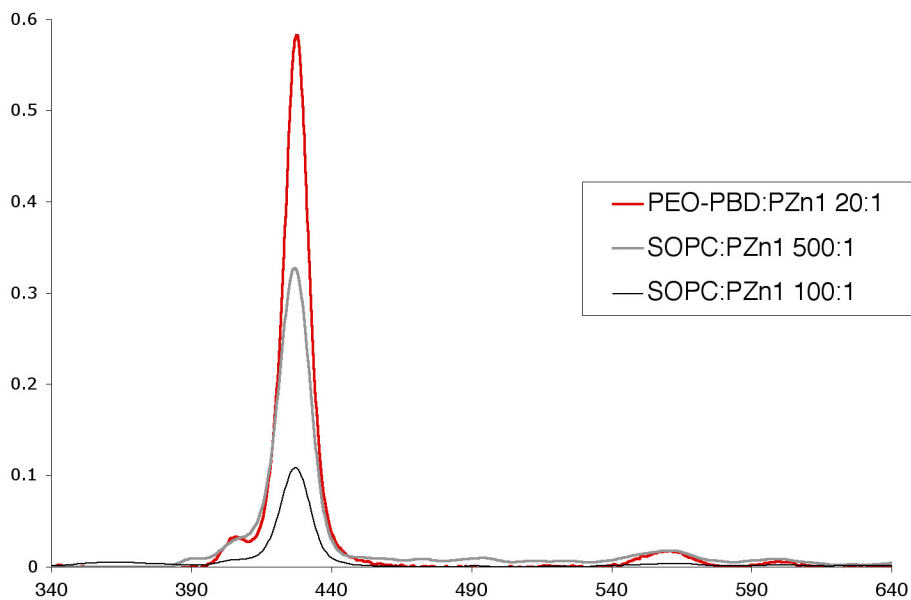**B**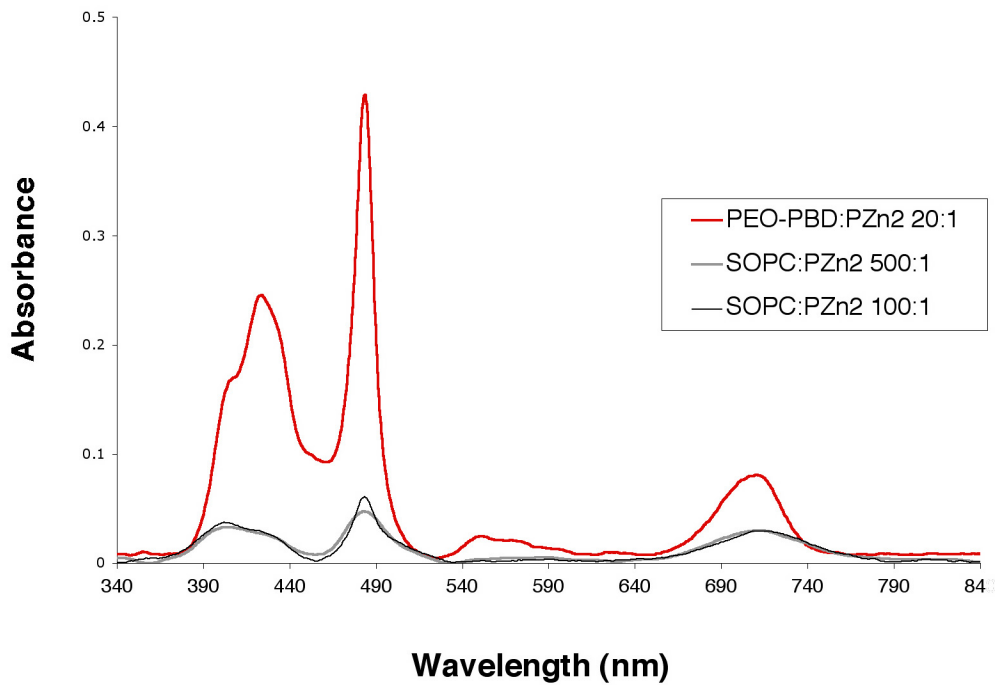

Supplement: pnas_102_8_2922__2.pdf [file pnas_102_8_2922__2.pdf]

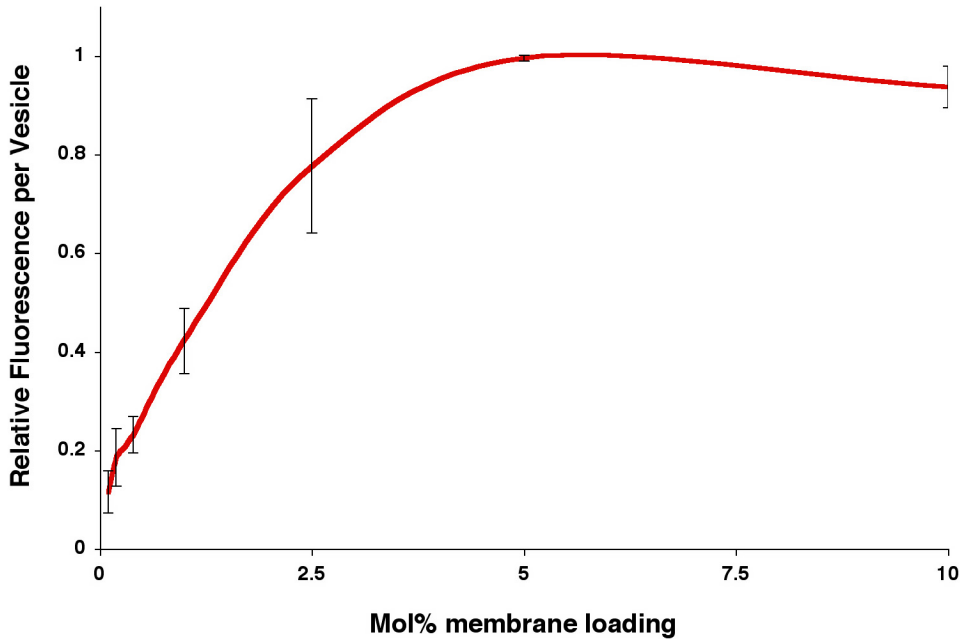

Supplement: pnas_102_8_2922__3.pdf [file pnas_102_8_2922__3.pdf]
